# Supplementary material
Source: PubMed Central journal article supplement (PMC3040484)
Supplement: 97320630005097S1.pdf [file 97320630005097S1.pdf]

### Supplementary materials:

**Table 1:** Details of cecropin gene sequences of *B. mori* retrieved from the NCBI database

| Ta | cDNA | Cecropin sub family | cDNA accession no | Gene/ Protein | Protein accession no | Reference authors           | Length of nucleotide sequence |
|----|------|---------------------|-------------------|---------------|----------------------|-----------------------------|-------------------------------|
| 1  |      |                     | S60579            | Cec -B        | AAC60501             | Kato <i>et al.</i> , 1993   | 420 bp                        |
| 2  |      | Cecropin B (7)      | D11113            | Cec -B        | BAA01889             | Taniai <i>et al.</i> , 1992 | 415 bp                        |
| 3  |      |                     | AF303891          | CBM-2         | AAG27715             | Li <i>et al.</i> , 2000     | 430 bp                        |
| 4  |      |                     | D11114            | Cec - B       | BAA01890             | Taniai <i>et al.</i> , 1992 | 402 bp                        |
| 5  |      |                     | S74297            | Cec -B        | ABU23728             | Jeffy, <i>et al.</i> , 1994 | 192 bp                        |
| 6  |      |                     | EU047749          | Cec -B        | ABU23728             | Jeffy <i>et al.</i> , 2007  | 192 bp                        |
| 7  |      |                     | AF303892          | CBM2-2        | AAG27716             | Zhang and Zhou, 2000        | 432 bp                        |
| 8  |      |                     | Cecropin A (3)    | AF303890      | CBM1                 | AAG27714                    | Li <i>et al.</i> , 2000       |
| 9  |      | S74376              |                   | Cec -A        | AAC60515             | Yamano <i>et al.</i> , 1994 | 560 bp                        |
| 10 |      | D17394              |                   | Cec -A        | BAA04217             | Yamano <i>et al.</i> , 1994 | 544 bp                        |
| 11 |      | Cecropin E          | DQ233467          | Cec -E        | ABB19289             | Hong <i>et al.</i> , 2005   | 393 bp                        |
| 12 |      | Cecropin D          | AB010825          | Cec-D         | BAA31507             | Yang <i>et al.</i> , 1994   | 287 bp                        |
| 13 |      | Enbocin             | U30289            | Enbocin       | BAA31507             | Yang <i>et al.</i> , 1995   | 287 bp                        |

**Table 2:** Genomic organization, orientation and chromosomal location of paralogous cecropin gene sequences of *Bombyx mori*

| Paralogous gene sequence ID | Gene        | Name of the protein | Scaffold & Position           | Orientation                                                                          | No. of exons & introns |    | Chromosomal location                                                                  |
|-----------------------------|-------------|---------------------|-------------------------------|--------------------------------------------------------------------------------------|------------------------|----|---------------------------------------------------------------------------------------|
|                             |             |                     |                               |                                                                                      | Ex                     | In |                                                                                       |
| BGIBMGA000017               | Cecropin D  | Cecropin D          | nscaf1071, 408,223 to 409,845 |  | 2                      | 1  |  |
| BGIBMGA000018               | Enbocin -3  | Enbocin -3          | nscaf1071, 400,159 to 402,528 |  | 2                      | 1  |  |
| BGIBMGA000020               | Cecropin E  | Cecropin E          | nscaf1071, 360,652 to 361,998 |  | 2                      | 1  |  |
| BGIBMGA000021               | Cecropin B1 | Cecropin B1         | nscaf1071, 359,316 to 359,899 |  | 2                      | 1  |  |
| BGIBMGA000023               | Cecropin B2 | Cecropin B2         | nscaf1071, 353,747 to 354,342 |  | 2                      | 1  |  |
| BGIBMGA000024               | Cecropin B3 | Cecropin B3         | nscaf1071, 346,992 to 348,048 |  | 2                      | 1  |  |

|               |             |                                   |                                                                                    |   |   |                                                                                     |
|---------------|-------------|-----------------------------------|------------------------------------------------------------------------------------|---|---|-------------------------------------------------------------------------------------|
| BGIBMGA000036 | Cecropin B4 | nscaf1071, 367,575 to 368,267     |  | 2 | 1 |  |
| BGIBMGA000037 | Cecropin B5 | nscaf1071, 386,711 to 387,454     |  | 2 | 1 |  |
| BGIBMGA000038 | Cecropin B6 | nscaf1071, 392,663 to 393,260     |  | 2 | 1 |  |
| BGIBMGA000039 | Enbocin-2   | nscaf1071, 431,749 to 432,960     |  | 2 | 1 |  |
| BGIBMGA006280 | Cecropin A  | nscaf2852, 1,255,833 to 1,256,608 |  | 2 | 1 |  |
| BGIBMGA014285 | Cecropin A  | scaffold1085, 1,402 to 2,514      |  | 2 | 1 |  |

**Table 3:** Expression pattern of *Bombyx mori* cecropin in different tissues based on the data obtained from silkworm EST database

| Expressed in tissue/organ   | Cecropin protein family |            |            |            |         |
|-----------------------------|-------------------------|------------|------------|------------|---------|
|                             | Cecropin A              | Cecropin B | Cecropin D | Cecropin E | Enbocin |
| Testis                      | -                       | 12%        | -          | 12%        | -       |
| Hemocyte                    | -                       | 3%         | -          | 4%         | -       |
| Prothoracic gland           | -                       | 1%         | 1%         | 2%         | 1%      |
| Brain                       | 4%                      | 24%        | 24%        | 28%        | 24%     |
| Antenna                     | -                       | 2%         | -          | 2%         | -       |
| Microbial infected fat body | 93%                     | 55%        | 18%        | 46%        | 39%     |
| Pheromone gland             | 1%                      | 1%         | -          | 2%         | -       |
| Ovary                       | -                       | -          | 1%         | -          | 1%      |
| Midgut                      | -                       | -          | 2%         | -          | 2%      |
| Fat body                    | -                       | -          | 1%         | -          | -       |
| Unknown                     | 1%                      | 1%         | 33%        | 2%         | 3%      |
| Unknown                     | 1%                      | 1%         | 20%        | 2%         | 2%      |
